**Classification: Biological Sciences; Neurosciences.**

**Title: Dentate gyrus somatostatin cells are required for contextual discrimination during episodic memory encoding**

**Authors:** Cristian Morales<sup>\*a</sup>, Juan Facundo Morici<sup>\*b</sup>, Nelson Espinosa<sup>a</sup>, Agostina Sacson<sup>b</sup>, Ariel Lara-Vasquez<sup>a</sup>, M. Alexandra Garcia-Perez<sup>a</sup>, Pedro Bekinschtein<sup>b</sup>, Noelia V. Weisstaub<sup>b</sup>, Pablo Fuentealba<sup>a,c,#</sup>

\* CM and JFM contributed equally to this work

**Affiliations:**

<sup>a</sup> Departamento de Psiquiatría, Centro Interdisciplinario de Neurociencia, Pontificia Universidad Católica de Chile, Santiago, Chile.

<sup>b</sup> Instituto de Neurociencia Cognitiva y Traslacional, Instituto de Neurología Cognitiva, Consejo Nacional de Investigaciones Científicas y Técnicas, Universidad Favaloro, Buenos Aires, Argentina.

<sup>c</sup> Centro de Investigación en Nanotecnología y Materiales Avanzados, Pontificia Universidad Católica de Chile, Santiago, Chile.

**Competing financial interests:** The authors declare no competing financial interests

# correspondence: [pfuentealba@uc.cl](mailto:pfuentealba@uc.cl)

**Keywords:** Hippocampus, Dentate gyrus, Pattern separation, Interneurons, Memory.

## **Abstract**

Episodic memory establishes and stores relations among the different elements of an experience, which are often similar and difficult to distinguish. Pattern separation, implemented by the dentate gyrus, is a neural mechanism that allows the discrimination of similar experiences by orthogonalizing synaptic inputs. Granule cells support such disambiguation by sparse rate coding, a process tightly controlled by highly diversified GABAergic neuronal populations, such as somatostatin-expressing cells which directly target the dendritic arbor of granule cells, massively innervated by entorhinal inputs reaching the molecular layer and conveying contextual information. Here, we tested the hypothesis that somatostatin neurons regulate the excitability of the dentate gyrus, thus controlling the efficacy of pattern separation during memory encoding in mice. Indeed, optogenetic suppression of dentate gyrus somatostatin neurons increased spiking activity in putative excitatory neurons and triggered dentate spikes. Moreover, optical inhibition of somatostatin neurons impaired both contextual and spatial discrimination of overlapping episodic-like memories during task acquisition. Importantly, effects were specific for similar environments, suggesting that pattern separation was selectively engaged when overlapping conditions ought to be distinguished. Overall, our results suggest that somatostatin cells regulate excitability in the dentate gyrus and are required for effective pattern separation during episodic memory encoding.

## **Significance statement**

Memory systems must be able to discriminate stored representations of similar experiences in order to efficiently guide future decisions. This is solved by pattern separation, implemented in the dentate gyrus by granule cells to support episodic memory formation. The tonic inhibitory bombardment produced by multiple GABAergic cell populations maintains low activity levels in granule cells, permitting the process of pattern separation. Somatostatin-expressing cells are one of those interneuron populations, selectively targeting the distal dendrites of granule cells, where cortical multimodal information reaches the dentate gyrus. Hence, somatostatin cells constitute an ideal candidate to regulate pattern separation. Here, by using optogenetic stimulation in mice, we demonstrate that somatostatin cells are required for the acquisition of both contextual and spatial overlapping memories.

## Introduction

Episodic memory is made up of a collection of different events which may contain overlapping information. The capacity to discriminate similar memory episodes, which could otherwise be confused, is critical for correct encoding (1), effective retrieval (2, 3), and avoiding catastrophic interference (4). Accordingly, disruptions of memory discrimination have been related to cognitive impairment in aging and neuropsychiatric disorders, such as depression or posttraumatic stress disorder (5–7). In addition, aging and epilepsy exhibit episodic memory deficits as very common symptoms, also showing disrupted pattern separation (8–10). Computational models suggest that pattern separation ought to be implemented for efficient discrimination of overlapping memories, by the transformation of similar patterns of inputs into segregated synaptic outputs (11–13). Abundant evidence from animal experiments support the hippocampus as the brain locus where pattern separation is implemented, in particular the dentate gyrus, which allows the discrimination of overlapping spatial representations (14–16) and similar contextual fear conditioning memories (17).

Subsets of granule cells in the dentate gyrus represent memory episodes in their activation patterns (18, 19), with similar episodes of experience being stored into distinct non-overlapping activation patterns in a process called orthogonalization (20–22) that is essential for pattern separation. Granule cells conform a large neuronal population that remains sparsely active due to strong inhibitory control provided by local GABAergic inputs (23–25). The tight regulation of granule cell excitability is critical (26, 27), as evidenced by deteriorated pattern separation when the spiking activity of granule cells is experimentally enhanced (28) or when tonic inhibition is decreased. Moreover, tonic inhibition of dentate gyrus granule cells is important for the control of memory interference (29). The most significant inhibitory inputs to granule cells arise locally from parvalbumin-expressing (PV) cells and somatostatin-expressing neurons (SOM) located mostly in the hilus (28, 30, 31). PV cells provide massive synaptic inhibition to the perisomatic region (32), whereas SOM directly innervate the dendritic arbor of granule cells. Granule cell dendritic arborization is largely distributed across the molecular layer, and it is this region where entorhinal inputs massively impinge carrying contextual information (30). Recent experiments have changed the view about the modulatory function of SOM and established their control over the excitability of granule cells in vitro (33) and the size of neuronal ensembles during memory encoding in vivo (34). Taken together, these findings suggest that SOM are ideally positioned to participate in contextual discrimination, possibly through the regulation of pattern separation by controlling the dendritic excitability of granule cells (8, 35). Hence, we tested the hypothesis that functional dentate gyrus SOM are required for contextual discrimination through the control of granule cells excitability. We found that optogenetic suppression of

SOM in the dentate gyrus modulated the firing rate of putative excitatory cells and putative PV interneurons. Moreover, optogenetic stimulation impaired both contextual and spatial discrimination of overlapping recognition memories during task acquisition. Our results suggest that SOM are required for successful pattern separation during episodic memory encoding.

## Results

**Optogenetic suppression of somatostatin cells disrupts dentate gyrus neuronal firing patterns and trigger dentate spikes.** In order to establish the effect of locally inhibiting SOM on the dentate gyrus network, we stereotaxically implanted an optrode covering the entire dorsoventral extension of the dentate gyrus (**Fig. S1**) in anesthetized double transgenic mice that selectively expressed the inhibitory halorhodopsin pump (NpHR+) in SOM (36, 37). To ensure the simultaneous recording of all three dentate gyrus laminae and optical suppression of hilar SOM (38), the tip of the optical fibre was positioned close to the hippocampal fissure (**Fig. 1A**). Next, we delivered prolonged laser pulses to achieve maximal optogenetic inhibition, reproducing previous experimental protocols (36, 37). Control experiments showed that effects were selective for transgenic NpHR+ animals, with little effect on control (NpHR-) mice (**Fig. S1**).

Overall, we found a small proportion of units changing their firing patterns upon laser stimulation in NpHR+ mice. A minor fraction of units (6.3%,  $n = 111$ ) robustly decreased (median = 57%, IQR = 55%) their activity relatively fast (median = 400 ms, IQR = 200 ms). Hence, such neuronal population was defined as SOM (**Fig. 1C**). Another small group of cells (12 %,  $n = 203$ ) showed a significant increase in firing rate (median = 87%, IQR 127%), presumably by synaptic disinhibition, with significantly slower kinetics than SOM (median = 2.4 s, IQR = 2 s,  $P < 0.001$ , **Fig. 1C, Fig. S1**). Dentate gyrus units have been previously classified as glutamatergic or GABAergic based on their *in vivo* spike duration and bursting patterns (39). Indeed, excitatory cells, such as mossy cells and granule cells exhibit longer trough-to-peak latency and higher burst index than GABAergic interneurons (39). Thus, we carried out a similar analysis. We first plotted all laser-responsive units in a bidimensional space comprised by spike duration and burst index (**Fig. 1D**). By definition, SOM comprised one cluster given their common physiological characteristic of optogenetic inhibition (**Fig. 1D,E**). Within the optically excited units we recognized two different populations. We considered one group of excited units as putative PV cells because of their short spikes, significantly more rapid than the other groups (median = 0.4 ms, IQR = 0.1 ms,  $P < 0.001$ ; **Fig. 1F**). Such short spike duration has been well documented in GABAergic PV cells (39–41) that are synaptically targeted by SOM (42). On the other hand, the other cluster of excited units was consistent with the presence of mossy cells and granule cells (M/G). Indeed, M/G units had slower spikes (median = 0.95 ms, IQR = 0.34 ms,  $P < 0.001$ ; **Fig. 1F**) and higher burst index (median = 0.8, IQR = 0.6,  $P < 0.001$ ; **Fig. 1G**) than either PV cells or SOM. Furthermore, there was no significant difference in response latency to optogenetic stimulation between PV cells and M/G units (**Fig. 1H**), but they were both significantly slower than SOM (median = 0.4 s, IQR = 0.2 s,  $P < 0.001$ ; **Fig. 1H**). These results suggest that a small proportion of both PV cells and M/G units was probably disinhibited upon optogenetic suppression of SOM.

Next, we aimed to evaluate the effect of the modulated synaptic output of SOM onto dentate gyrus oscillatory activity. We noted that at the end of laser pulses a prominent deflection was apparent in the dentate gyrus field potential (**Fig. 1B**) that was probably the result of rebound activity in SOM (**Fig. 1C**). A similar effect has been previously described in the dorsal CA1 area (43). We then quantified the spectral distribution of dentate gyrus activity. The LFP frequency spectrum showed a prominent shoulder in the gamma range (30-80 Hz) which then decayed with the characteristic  $1/f$  distribution at higher frequencies ((44), **Fig. S2**). Interestingly, optogenetic suppression of SOM selectively decreased power in the high-frequency range (100-250 Hz, **Fig. S2**). Dentate spikes are hallmark population patterns exclusive of the dentate gyrus, which due to their large-amplitude, short-duration can be detected in the high-frequency activity range (45). Indeed, high-pass filtering LFP recordings, particularly in the hilar region, evidenced the presence of prominent dentate spikes (**Fig. 1I,J**). Dentate spikes result from massive dendritic depolarization and perisomatic inhibition of granule cells (45, 46). Given that optogenetic suppression of SOM increased the activity of putative granule cells and PV interneurons, that inhibit the perisomatic region of granule cells (38), we reasoned that during optical stimulation the incidence of dentate spikes was likely to increase. Indeed, crosscorrelation analysis between laser pulses and dentate spikes showed a significant increase in their probability of occurrence (**Fig. 1K**). Similarly, their incidence increased when comparing the periods before and after the onset of laser stimulation (**Fig. S2**). Hence, the inhibition of SOM may disinhibit PV interneurons and granule cells, with the concomitant increase of network excitability, reflected in the elevated density of dentate spikes. Altogether, our results suggest that optogenetic inhibition of SOM disrupts local network activity patterns in the dentate gyrus.

**Encoding of overlapping contextual memories requires functional glutamatergic transmission and somatostatin cells in the dentate gyrus.** Fully functional granule cells are necessary for the discrimination of similar contexts (17, 47) as well as the acquisition of novel information. However, the role of other dentate gyrus cell-types is not so well established, particularly interneuron populations that regulate the spike timing of granule cells. Hence, we investigated the contribution of hilar SOM to behavioural performance in context-dependent memory tasks. To test this idea, we developed a variation of the object-in-context task (48–52). We reasoned that discrimination of the novel object-context pairing should recruit the dentate gyrus only when contextual configurations were overlapping. Accordingly, we manipulated contextual information by training animals in the object-in-context task using similar or dissimilar contexts (**Fig. 2A, Fig. S3**). First, we evaluated whether the dentate gyrus was engaged in contextual memory encoding in this test. For this, we blocked glutamatergic transmission during memory encoding by infusing

DNQX into the dentate gyrus preceding every training session. Regardless of the object-context configuration, blockade of AMPA receptors did not affect exploratory behaviour during training sessions (**Fig. S4**). Consistent with our hypothesis, blocking dentate gyrus excitatory transmission obliterated discrimination during the test only when contexts were similar (mean = 0.013, SEM = 0.012,  $P < 0.001$ ; **Fig. 2C,E, Fig. S5**). Importantly, the experimental manipulation did not affect total exploration time (**Fig. 2D,F**), suggesting that these results were not due to changes in motivation, awareness, or exploratory behaviour in general. Together, these results suggest that glutamatergic transmission in the dentate gyrus is necessary for the encoding of object-in-context memories only when the contextual information presented is similar, consistent with the observation that pattern separation is engaged only when overlapping spatial representations ought to be discriminated (14, 53).

It has also been proposed that the dentate gyrus is recruited during the retrieval of similar representations (54–56). Therefore, we manipulated glutamatergic transmission in the dentate gyrus during memory recall (**Fig. S6**). For that purpose, we performed the object-in-context task in the similar condition and infused DNQX into the dentate gyrus 15 minutes before the test session, when memory is retrieved. In this condition, we did not detect any effect of the drug on discrimination. Interestingly, blocking AMPA receptors influenced behaviour as exploration times were higher for drug-infused animals (mean = 33.83 s, SEM = 1.95 s,  $P < 0.001$ ; **Fig. S6**). Hence, this result suggests that the dentate gyrus is actively engaged during encoding of similar contextual representations, but not during their retrieval.

Recent evidence suggests that SOM are recruited during fear memory formation (34, 57) and may participate in pattern separation by controlling the size of engrams encoding spatial representations (34, 38, 58). Consequently, we conducted the object-in-context task in our transgenic mice expressing functional halorhodopsin (NpHR+) in SOM (36). We bilaterally implanted optic fibres into the dentate gyrus (**Fig. 2B**) in order to activate NpHR during the training sessions (**Fig. 2A**). Laser stimulation did not affect the distribution of object exploration times during training sessions for neither task version (**Fig. 2H,J, Fig. S4**). Nonetheless, optogenetic inhibition of SOM during the training session impaired discrimination during retrieval when contexts were similar (mean = 0.09, SEM = 0.098,  $P < 0.01$ ; **Fig. 2G, Fig. S5**). This effect was specific, as it was not detected for the dissimilar context (**Fig. 2I, Fig. S5**), suggesting that dentate gyrus SOM regulate the encoding of object-in-context memory only when contextual information is similar. Overall, this result suggests that SOM regulate the encoding of contextual recognition memory by controlling excitatory activity in the dentate gyrus.

**Discrimination of overlapping spatial configurations is regulated by somatostatin neurons during memory encoding.** We showed that SOM can control the encoding of contextual recognition memory. Previous studies have shown the essential role played by granule cells in encoding distinct neural representations of overlapping spatial configurations (20, 22, 59). Furthermore, inhibition of the lateral entorhinal input disrupts pattern separation in spatial tasks (60). Therefore, we reasoned that hilar SOM may also regulate the encoding of overlapping spatial configurations. To test this, we conducted the spontaneous location recognition task that has been shown to be sensitive to the functional integrity of the dentate gyrus (16). In this task animals explore three identical objects placed in separate locations and are then tested with two objects, with one object placed in a familiar location and another object placed in between the previous two locations (**Fig. 3A**). As the two objects are placed closer together in the training session, it becomes more difficult for mice to discriminate the novel location in the test session (16, 61, 62). Accordingly, we varied the angle between objects during the training sessions in small (50 degrees), medium (120 degrees), or large (180 degrees) separations; and compared the exploration times between the training and test session. We found that mice were able to discriminate correctly the medium and large separations, yet failed to distinguish the small separation (mean = -0.062, SEM = 0.068,  $P < 0.05$ ; **Fig. 3B**). This effect was robustly expressed during the entire test session (**Fig. S7**). These results suggest that the small separation is too ambiguous for mice to be able to discriminate it. Thus, we assessed whether spatial discrimination of the medium configuration relied on the activity of hilar SOM. For that, we chronically implanted bilateral optic fibres on the hippocampal fissure of transgenic NpHR+ mice (**Fig. 3D**) to optogenetically inhibit SOM during memory encoding. Laser stimulation had no effect on exploratory behaviour during the training sessions (**Fig. S7**). However, optogenetic inhibition of SOM during acquisition selectively impaired spatial discrimination in NpHR+ mice without affecting performance in control NpHR- mice (mean = 0.014, SEM = 0.012,  $P < 0.05$ ; **Fig. 3E**). Importantly, exploratory behaviour of mice was not affected by laser stimulation (**Fig. 3F**). This result suggests that SOM regulate the encoding of spatial recognition memory by controlling neural activity in the dentate gyrus. Overall, our results suggest that SOM can regulate both the reactivity and excitability of granule cells in-vivo (**Fig. S8**).



## Discussion

Here, we studied the physiological and behavioral effects of selectively suppressing dentate gyrus SOM during contextual memory acquisition. We found that inhibition of SOM increased the activity of two neuronal populations identified on the basis of their brief spike waveforms and firing patterns. Indeed, inhibitory interneurons, putative PV cells, were identified by their fast spiking pattern and short spikes (39–41); whereas, excitatory neurons, putative granule cells and mossy cells, were recognised by their bursting pattern and slow spikes (39). Both neuronal populations increased their activity during laser stimulation, probably resulting from synaptic disinhibition (30), which was also consistent with the enhanced incidence of dentate spikes, a hallmark of dentate gyrus synchronous activity (45, 46). Low excitability of granule cells has been proposed as a requirement for efficient orthogonalization of afferent spiking patterns arising in the entorhinal cortex (27). Thus, nonselective increments of activity in granule cells are predicted to alter efficient pattern separation. By performing two types of episodic-like memory tasks, one contextual and another spatial, we reveal that discrimination of similar memories is disrupted by optogenetic inhibition of dentate gyrus SOM.

The hippocampus has been proposed as a key structure for the control of memory expression using contextual information (63). For this reason, the ability to differentiate overlapping contextual information during encoding should be important to facilitate posterior memory recall (64). In this regard, previous studies have typically used the fear conditioning paradigm to characterize the role of the dentate gyrus in encoding overlapping contextual information (17, 65). Given the emotional valence of this kind of task, the amygdala is likely to be recruited (66), and possibly activate the hippocampus. Indeed, the basolateral amygdala is densely interconnected with the ventral hippocampus (67–69). Thus, engagement of the dentate gyrus is expected when the amygdala is massively activated during aversive memory formation. The dentate gyrus also participates in the differentiation of overlapping object-spatial representations in neutral conditions (16, 62). By experimentally manipulating object-context associations we establish here that excitatory activity in the dentate gyrus mediated by AMPA receptors is necessary to discriminate overlapping contextual associations. Our results suggest that the dentate gyrus is involved in the general process of discriminating overlapping spatial-contextual information independently of its emotional valence. Specifically, we show that inhibition of hilar SOM impaired the acquisition of similar contextual and spatial representations, thus suggesting that somatostatin-dependent inhibition of the dentate gyrus is at play in the discrimination of different types of similar episodic memories. During pattern separation, different neuronal engrams represent similar contexts (59). It has been shown that some of the dentate gyrus cells are highly sensitive to small changes in contextual cues (20, 70), suggesting that dentate gyrus ensembles recognize differences

in contextual information with high sensitivity. Importantly, SOM regulate the size of such memory ensembles (34), and thus inhibiting SOM is expected to dysregulate both the size and specificity of memory engrams. This hypothesis is supported by the anatomical distribution of SOM that selectively target the most external region of the dendritic trees of granule cells in the outer molecular layer (38), where contextual information is conveyed by entorhinal inputs (58), and damage to those afferents impairs spatial pattern separation (60). Thus, the behavioral impairment resulting from the optogenetic inhibition of SOM could be attributed to deficits in the ability of the dentate gyrus to differentially encode contextual information resulting from impaired pattern separation.

Pattern separation is believed to be critical during contextual memory acquisition, but its contribution to memory recall remains debated. It has been proposed that inhibition and excitation of dentate gyrus circuits play different roles during encoding, consolidation, or recall of overlapping memories (71, 72). This is supported by the blockade of dentate gyrus AMPA and kainite receptors, which impairs the expression of fear memory (73), while the blockade of GABA<sub>A</sub> receptors impairs consolidation, yet not the acquisition or retrieval of fear memories (74). Some theoretical models propose that sparse patterns of neuronal activation in the dentate gyrus guide memory encoding in the CA3 region, whereas memory retrieval is mediated through direct entorhinal inputs to the CA3 region (26). However, other studies suggest that the dentate gyrus contributes to both memory encoding and retrieval (54–56). This is supported by recent studies showing that recall cues can trigger reactivation of neural ensembles active in the dentate gyrus during memory encoding (19, 75, 76). Interestingly, we found that blockade of dentate gyrus AMPA receptors did not affect the recall of contextual memories. The differences observed could be, at least partly, due to methodological reasons. For example, we pharmacologically blocked AMPA receptors before the test session whereas the above-mentioned studies selectively controlled very specific subsets of dentate gyrus neurons. Hence, our results support the idea that the role of the dentate gyrus in the process of pattern separation is restricted to the encoding phase, at least, for emotionally-neutral memories.

Feedback inhibition in the dentate gyrus is necessary for appropriate orthogonalization of neuronal ensembles representing similar memory episodes (77). SOM receive direct inputs from both mature (38) and newborn (78) granule cells. Both granule cell populations have been proposed as drivers of feedback inhibition in pattern separation (34, 79). Several studies proposed a leading role for newborn granule cells (77, 79). Indeed, the activation of newborn granule cells engages inhibitory feedback principally arising from PV interneurons that provide perisomatic inhibition, but not from SOM that provide dendritic inhibition (80). Moreover, ablation of hippocampal neurogenesis induces high excitability in granule cells (81) and impairs pattern separation (15), supporting the

idea that feedback inhibition mediated by PV interneurons controls pattern separation. On the other hand, a recent study suggests that mature granule cells poorly engage PV interneurons and preferentially excite SOM in vivo (34). Thus, it is plausible that in pattern separation two parallel circuits are engaged during feedback inhibition. One circuit in which newborn granule cells preferentially recruit PV cells and another circuit where mature granule cells preferentially activate SOM that would control the inhibition of granule cells directly. Since newborn cells are more excitable than granule cells (82), it is possible that feedback activity of SOM is more delayed than feedback inhibition of PV cells. Interestingly, computational models of pattern separation predict little contribution for the inhibitory feedback provided by SOM (77). Our results suggest that feedback inhibition provided by SOM is necessary for pattern separation and it will be interesting that future computational studies consider this parameter when modelling hippocampal networks.

Furthermore, the regulation of orthogonalization of granule cells relies heavily on the perisomatic lateral inhibition provided by parvalbumin cells (83, 84). In turn, lateral inhibition might be controlled by SOM through direct dendritic inhibition of granule cells and perisomatic inhibition of parvalbumin cells (30). When mice explore novel environments, thus forming new memories, or during intense presynaptic activity in the dentate gyrus in vitro, dendritic inhibition is significantly larger than perisomatic inhibition (85, 86). A population of SOM locally innervates fast-spiking PV cells in the dentate gyrus and distally several other cell-types in the septum (30). Consistent with such anatomic connectivity, we found that inhibition of SOM increased the activity of putative PV neurons and granule cells. Moreover, we observed increased incidence of dentate spikes, which results from simultaneous, brief dendritic depolarization and perisomatic inhibition of granule cells (45, 46). Furthermore, SOM synaptically target PV interneurons unidirectionally, with no feedback projection described to date (42, 87). This synaptic projection regulates both the discharge probability and spike timing of PV neurons (30, 42). These changes in the dentate gyrus circuit are consistent with memory deficits and disrupted pattern separation taking place in cases where the population of hilar SOM is selectively decreased, such as epilepsy or aging (6, 10, 88). In summary, our results suggest that SOM regulate general excitability in the dentate gyrus and are required for pattern separation during episodic memory encoding.

## Material and methods

95 adult male and female (C57Bl/6J, Ai39, B6, 129S-Gt(ROSA)26Sor<sup>tm39(CAG-HOP/EYFP)Hze</sup>/J, Sst-IRES-Cre, Sst<sup>tm2.1(cre)Zjh</sup>/J and B6N.Cg-Sst<sup>tm2.1(cre)Zjh</sup>/J) were used. All transgenic lines were obtained from Jackson laboratories ([www.jax.org](http://www.jax.org)). Mice were deeply anesthetized with urethane and acutely implanted with multielectrode probes ([www.neuronexus.com](http://www.neuronexus.com)) targeting the dorsal dentate gyrus (-2.0 mm AP, 1.5 mm ML from Bregma) to record neural activity while SOM were optogenetically suppressed with laser stimulation (532 nm, 5-12 mW). Particularly, 33 mice were chronically implanted with optic fibres or cannulated in the dentate gyrus and trained in contextual and spatial object recognition memory tasks. In both tasks, mice were first habituated to the arena, next trained in the task, and then tested in the final session. In some sessions, animals were locally injected in the dentate gyrus with an AMPA receptor blocker (DNQX, 1.89 µg/µl, 0.3 ul). Behavioral analysis included quantification of exploration time and discrimination index. Spectral analysis of LFP was computed using multitaper Fourier analysis from the Chronux toolbox (<http://www.chronux.org>) by using MATLAB. Spike sorting and single unit analysis was performed offline using MATLAB based graphical cluster-cutting software, Mclust/Klustakwik-toolbox (version 3.5; (89)). To verify recording sites, optic fibers and cannulae tracks, Nissl-staining was conducted following the completion of study. See Supplementary Materials and Methods section for a detailed description of the experimental and analytic methods.

## Acknowledgments

We thank Maria José Díaz and David Alberto Jaime for their technical assistance.

## Funding

This work was funded by the National Commission for Scientific and Technological Research (CONICYT) scholarship, Chile (to C.M. 21140967); The School of Medicine, Pontificia Universidad Católica de Chile (to C.M. PMD-02/17), The Programa de Investigación Asociativa (PIA) Anillos de Ciencia y Tecnología (to P.F. ACT 1414 and ACT 172121); and Fondecyt Regular grant (to P.F. 1190375); The National Agency of Scientific and Technological Promotion of Argentina (ANPCyT, to N.V.W. PICT 2015-2344) and 2016 LARC-IBRO PROLAB program (to N.V.W.) for Latin American labs cooperation.

## References

1. L. L. Colgin, E. I. Moser, M. Moser, Understanding memory through hippocampal remapping. 469–477 (2008).
2. B. C. Dickerson, H. Eichenbaum, The Episodic Memory System: Neurocircuitry and Disorders. *Neuropsychopharmacology* **35**, 86–104 (2009).

3. J. C. Hulbert, K. A. Norman, Neural Differentiation Tracks Improved Recall of Competing Memories Following Interleaved Study and Retrieval Practice. 3994–4008 (2015).
4. J. L. McClelland, N. H. Goddard, Considerations Arising From a Complementary Learning Systems Perspective on Hippocampus and Neocortex. **665**, 654–665 (1997).
5. M. A. Kheirbek, K. C. Klemenhagen, A. Sahay, R. Hen, review Neurogenesis and generalization: a new approach to stratify and treat anxiety disorders. **15**, 1613–1620 (2012).
6. H. M. Holden, P. E. Gilbert, Less efficient pattern separation may contribute to age-related spatial memory deficits. **4**, 1–6 (2012).
7. S. L. Leal, M. A. Yassa, applications of pattern separation (2018) <https://doi.org/10.1038/s41593-017-0065-1>.
8. N. C. De Lanerolle, J. H. Kim, R. J. R, D. D. Spencer, Hippocampal interneuron loss and plasticity in human temporal lobe epilepsy. **495**, 387–395 (1989).
9. H. M. Holden, C. Hoebel, K. Loftis, P. E. Gilbert, H. E. T. Al, Spatial Pattern Separation in Cognitively Normal Young and Older Adults. **000** (2012).
10. A. Reyes, *et al.*, Neuropsychologia Impaired spatial pattern separation performance in temporal lobe epilepsy is associated with visuospatial memory deficits and hippocampal volume loss. **111**, 209–215 (2018).
11. R. C. O. Reilly, J. L. McClelland, Hippocampal Conjunctive Encoding, Storage, and Recall: Avoiding a Trade-off. **4** (1994).
12. A. Treves, E. T. Rolls, Computational Analysis of the Role of the Hippocampus in Memory. **4**, 374–391 (1994).
13. J. McClelland, B. McNaughton, R. O’Reilly, Why there are Complementary Learning Systems in the Hippocampus and Neocortex: Insights from the Successes and Failures of connectionist models of Learning and Memory.
14. P. E. Gilbert, R. P. Kesner, W. E. Decoteau, Memory for Spatial Location: Role of the Hippocampus in Mediating Spatial Pattern Separation. **18**, 804–810 (1998).
15. C. D. Clelland, *et al.*, A functional role for adult hippocampal neurogenesis in spatial pattern separation. *Science (New York, N.Y.)* **325**, 210–3 (2009).
16. P. Bekinschtein, *et al.*, BDNF in the Dentate Gyrus Is Required for Consolidation of “Pattern-Separated” Memories. *CellReports* **5**, 759–768 (2013).
17. T. McHugh, *et al.*, Dentate Gyrus NMDA Receptors Mediate Rapid Pattern Separation in the Hippocampal Network. **317**, 94–100 (2007).
18. S. Ramirez, S. Tonegawa, X. Liu, Identification and optogenetic manipulation of memory engrams in the hippocampus. **7**, 1–9 (2014).

19. S. Ramirez, *et al.*, Creating a False Memory in the Hippocampus. **341**, 387–391 (2013).
20. J. K. Leutgeb, S. Leutgeb, M. Moser, E. I. Moser, Pattern Separation in the Dentate Gyrus and CA3 of the Hippocampus. **315** (2007).
21. W. Deng, M. Mayford, F. H. Gage, Selection of distinct populations of dentate granule cells in response to inputs as a mechanism for pattern separation in mice. 1–21 (2013).
22. J. P. Neunuebel, J. J. Knierim, CA3 Retrieves Coherent Representations from Degraded Input: Direct Evidence for CA3 Pattern Completion and Dentate Gyrus Pattern Separation. *Neuron* **81**, 416–427 (2013).
23. M. W. Jung, B. L. Mcnaughton, Spatial Selectivity of Unit Activity in the Hippocampal Granular Layer. **3**, 165–182 (1993).
24. D. Nitz, B. Mcnaughton, Differential Modulation of CA1 and Dentate Gyrus Interneurons During Exploration of Novel Environments. 863–872 (2004).
25. N. B. Danielson, *et al.*, Distinct Contribution of Adult-Born Hippocampal Granule Cells to Context Encoding. *Neuron*, 101–112 (2016).
26. E. T. Rolls, R. P. Kesner, A computational theory of hippocampal function, and empirical tests of the theory. **79**, 1–48 (2006).
27. E. T. Rolls, The mechanisms for pattern completion and pattern separation in the hippocampus. *Frontiers in systems neuroscience* **7**, 74 (2013).
28. S. Jinde, *et al.*, Hilar Mossy Cell Degeneration Causes Transient Dentate Granule Cell Hyperexcitability and Impaired Pattern Separation. **76**, 1189–1200 (2013).
29. E. Engin, *et al.*, Tonic Inhibitory control of dentate gyrus granule cells by  $\alpha$ 5-containing GABAA receptors reduces memory interference. *Journal of Neuroscience* **35**, 13698–13712 (2015).
30. M. Yuan, *et al.*, Somatostatin-positive interneurons in the dentate gyrus of mice provide local- and long-range septal synaptic inhibition. 1–25 (2017).
31. D. Zou, *et al.*, DREADD in Parvalbumin Interneurons of the Dentate Gyrus Modulates Anxiety, Social Interaction and Memory Extinction. *Current Molecular Medicine* **16**, 91–102 (2016).
32. A. Kepecs, G. Fishell, Interneuron Cell Types: Fit to form and formed to fit. *Nature* **505**, 318–326 (2014).
33. G. Hofmann, L. Balgooyen, J. Mattis, K. Deisseroth, P. S. Buckmaster, Hilar somatostatin interneuron loss reduces dentate gyrus inhibition in a mouse model of temporal lobe epilepsy. **1**, 1–7 (2016).
34. T. Stefanelli, *et al.*, Hippocampal Somatostatin Interneurons Control the Size of Neuronal Memory Ensembles Article Hippocampal Somatostatin Interneurons Control the Size of Neuronal Memory Ensembles. 1–12 (2016).

35. E. M. Goldberg, D. A. Coulter, Mechanisms of epileptogenesis: a convergence on neural circuit dysfunction. *Nature Publishing Group* **14**, 337–349 (2013).
36. N. Espinosa, *et al.*, Basal Forebrain Gating by Somatostatin Neurons Drives Prefrontal Cortical Activity. 1–12 (2018).
37. N. Espinosa, A. Alonso, L. Ariel, P. Fuentealba, Basal forebrain somatostatin cells differentially regulate local gamma oscillations and functionally segregate motor and cognitive circuits. 1–12 (2019).
38. T. F. Freund, G. Buzsáki, Interneurons of the Hippocampus. **470** (1996).
39. Y. Senzai, G. Buzsáki, Physiological Properties and Behavioral Correlates of Hippocampal Granule Cells and Mossy Cells Article Physiological Properties and Behavioral Correlates of Hippocampal Granule Cells and Mossy Cells. 691–704 (2017).
40. M. Frotscher, N. Spruston, M. Frotscher, N. S. Spe-, Specialized Electrophysiological Properties of Anatomically Identified Neurons in the Hilar Region of the Rat Fascia Dentata (1998).
41. Y. Yanagawa, *et al.*, Morpho-physiological Criteria Divide Dentate Gyrus Interneurons into Classes. **203**, 189–203 (2014).
42. S. Savanthrapadian, *et al.*, Synaptic Properties of SOM- and CCK-Expressing Cells in Dentate Gyrus Interneuron Networks. **34**, 8197–8209 (2014).
43. S. Royer, *et al.*, Control of timing, rate and bursts of hippocampal place cells by dendritic and somatic inhibition. *Nature Neuroscience* **15**, 769–775 (2012).
44. W. J. Freeman, L. J. Rogers, M. D. Holmes, D. L. Silbergeld, Spatial spectral analysis of human electrocorticograms including the alpha and gamma bands. *Journal of Neuroscience Methods* **95**, 111–121 (2000).
45. A. Bragin, G. Jandó, Z. Nádasdy, M. Van Landeghem, G. Buzsáki, Dentate EEG Spikes and Associated Interneuronal Population Bursts in the Hippocampal Hilar Region of the Rat. **73** (1995).
46. M. Penttonen, A. Kamondi, A. Sik, Feed-Forward and Feed-Back Activation of the Dentate Gyrus In Vivo During Dentate Spikes and Sharp Wave Bursts. **450**, 437–450 (1997).
47. N. B. Danielson, *et al.*, Distinct Contribution of Adult-Born Hippocampal Granule Cells to Context Encoding Article Distinct Contribution of Adult-Born Hippocampal Granule Cells to Context Encoding. 101–112 (2016).
48. M. J. Eacott, G. Norman, Integrated Memory for Object , Place , and Context in Rats: A Possible Model of Episodic-Like Memory? **24**, 1948–1953 (2004).
49. D. I. G. Wilson, *et al.*, Lateral Entorhinal Cortex is Critical for Novel Object-Context Recognition. **366**, 352–366 (2013).

50. J. F. Morici, P. Bekinschtein, N. V. Weisstaub, Medial Prefrontal Cortex Role in Recognition Memory in Rodents. *Elsevier B.V.* (2015) <https://doi.org/10.1016/j.bbr.2015.06.030>.
51. J. F. Morici, *et al.*, 5-HT<sub>2a</sub> receptor in mPFC influences context-guided reconsolidation of object memory in perirhinal cortex. *eLife* **7**, e33746 (2018).
52. J. F. Morici, *et al.*, Serotonin 2a receptor and serotonin 1a receptor interact within the medial prefrontal cortex during recognition memory in mice. *Frontiers in Pharmacology* **6**, 1–12 (2015).
53. P. E. Gilbert, R. P. Kesner, I. Lee, Dissociating Hippocampal Subregions: A Double Dissociation Between Dentate Gyrus and CA1. **636**, 626–636 (2001).
54. C. A. Denny, *et al.*, Hippocampal Memory Traces Are Differentially Modulated by Experience, Time, and Adult Neurogenesis. 189–201 (2014).
55. F. B. Krasne, J. D. Cushman, M. S. Fanselow, A Bayesian context fear learning algorithm / automaton. **9**, 1–22 (2015).
56. B. E. Bernier, *et al.*, Dentate Gyrus Contributes to Retrieval as well as Encoding: Evidence from Context Fear Conditioning, Recall, and Extinction. **37**, 6359–6371 (2017).
57. M. Lovett-Barron, *et al.*, Dendritic Inhibition in the Hippocampus Supports Fear Learning. **1**, 857–864 (2014).
58. E. L. Hargreaves, G. Rao, I. Lee, J. J. Knierim, Neuroscience: Major dissociation between medial and lateral entorhinal input to dorsal hippocampus. *Science* **308**, 1792–1794 (2005).
59. W. Deng, M. Mayford, F. H. Gage, Selection of distinct populations of dentate granule cells in response to inputs as a mechanism for pattern separation in mice. 1–21 (2013).
60. C. Vivar, *et al.*, Monosynaptic inputs to new neurons in the dentate gyrus. *Nature Communications* **3**, 1107–1111 (2012).
61. M. Miranda, *et al.*, Molecular Mechanisms in Perirhinal Cortex Selectively Necessary for Discrimination of Overlapping Memories, but Independent of Memory Persistence. *Eneuro* **4**, ENEURO.0293-17.2017 (2017).
62. M. Miranda, *et al.*, NMDA receptors and BDNF are necessary for discrimination of overlapping spatial and non-spatial memories in perirhinal cortex and hippocampus. *Neurobiology of Learning and Memory* **155**, 337–343 (2018).
63. A. R. Preston, H. Eichenbaum, Interplay of hippocampus and prefrontal cortex in memory. *Current Biology* **23**, 1–21 (2013).
64. P. Greene, M. Howard, R. Bhattacharyya, J. M. Fellous, Hippocampal anatomy supports the use of context in object recognition: A computational model. *Computational Intelligence and Neuroscience* **2013** (2013).



65. A. Sahay, *et al.*, Increasing adult hippocampal neurogenesis is sufficient to improve pattern separation. 3–10 (2011).
66. J. Zheng, *et al.*, Multiplexing of Theta and Alpha Rhythms in the Amygdala-Hippocampal Circuit Supports Pattern Separation of Emotional Information Article Multiplexing of Theta and Alpha Rhythms in the Amygdala-Hippocampal Circuit Supports Pattern Separation of Emotional I. *Neuron*, 1–12 (2019).
67. Y. Yang, J.-Z. Wang, From Structure to Behavior in Basolateral Amygdala-Hippocampus Circuits. *Frontiers in Neural Circuits* **11**, 1–8 (2017).
68. A. C. Felix-Ortiz, K. M. Tye, Amygdala Inputs to the Ventral Hippocampus Bidirectionally Modulate Social Behavior. *Journal of Neuroscience* **34**, 586–595 (2014).
69. N. S. Ahlgrim, J. R. Manns, Optogenetic Stimulation of the Basolateral Amygdala Increased Theta-Modulated Gamma Oscillations in the Hippocampus. *Frontiers in Behavioral Neuroscience* **13**, 1–13 (2019).
70. N. B. B. Danielson, *et al.*, Distinct Contribution of Adult-Born Hippocampal Granule Cells to Context Encoding. *Neuron* **90**, 101–112 (2016).
71. I. Lee, R. P. Kesner, Differential Contributions of Dorsal Hippocampal Subregions to Memory Acquisition and Retrieval in Contextual Fear-Conditioning. **310**, 301–310 (2004).
72. E. T. Rolls, The storage and recall of memories in the hippocampo-cortical system. 577–604 (2018).
73. J. L. Pierson, S. E. Pullins, J. J. Quinn, P. E. T. Al, Dorsal Hippocampus Infusions of CNQX into the Dentate Gyrus Disrupt Expression of Trace Fear Conditioning. **785**, 779–785 (2015).
74. S. Shahidi, A. Komaki, M. Mahmoodi, R. Lashgari, The role of GABAergic transmission in the dentate gyrus on acquisition, consolidation and retrieval of an inhibitory avoidance learning and memory task in the rat. **04**, 1–7 (2008).
75. X. Liu, *et al.*, Optogenetic stimulation of a hippocampal engram activates fear memory recall. **484**, 381–385 (2012).
76. T. J. Ryan, D. S. Roy, M. Pignatelli, A. Arons, S. Tonegawa, Engram cells retain memory under retrograde amnesia. **348**, 1007–1014 (2015).
77. K. Mcavoy, A. Besnard, A. Sahay, Adult hippocampal neurogenesis and pattern separation in DG: a role for feedback inhibition in modulating sparseness to govern population-based coding. **9**, 1–7 (2015).
78. S. Yang, A. Groisman, A. Schinder, Modulation of adult-born neuron excitability by coupling to GABAergic networks (2019) <https://doi.org/http://dx.doi.org/10.1101/598615>.
79. L. J. Drew, *et al.*, Activation of local inhibitory circuits in the dentate gyrus by adult-born neurons. *Hippocampus* **26** (2016).

80. S. G. Temprana, *et al.*, Delayed Coupling to Feedback Inhibition during a Critical Period for the Integration of Adult-Born Granule Cells Article Delayed Coupling to Feedback Inhibition during a Critical Period for the Integration of Adult-Born Granule Cells. *Neuron* **85**, 116–130 (2015).
81. T. Ikrar, *et al.*, Adult neurogenesis modifies excitability of the dentate gyrus. *Frontiers in Neural Circuits* **7**, 1–15 (2013).
82. A. Marín-burgin, L. A. Mongiat, M. B. Pardi, A. F. Schinder, Unique Processing During a Period of High Excitation/Inhibition Balance in Adult- Born Neurons (2012).
83. S. Sambandan, J. Sauer, I. Vida, M. Bartos, Associative Plasticity at Excitatory Synapses Facilitates Recruitment of Fast-Spiking Interneurons in the Dentate Gyrus. **30**, 11826–11837 (2010).
84. S. Guzman, *et al.*, Fast signaling and focal connectivity of PV+ interneurons ensure efficient pattern separation by lateral inhibition in a full-scale dentate gyrus network model (2019) <https://doi.org/http://dx.doi.org/10.1101/647800>.
85. E. Moser, Altered Inhibition in an Exploration of Dentate Task Granule Cells during Spatial Learning. **76** (1996).
86. Y. Liu, J. Cheng, C. Lien, Rapid Dynamic Changes of Dendritic Inhibition in the Dentate Gyrus by Presynaptic Activity Patterns. **34**, 1344–1357 (2014).
87. L. Acsády, I. Katona, F. Martínez-Guijarro, G. Buzsáki, T. Freund, Unusual Target Selectivity of Perisomatic Inhibitory Cells in the Hilar Region of the Rat Hippocampus. **20**, 6907–6919 (2000).
88. A. M. Spiegel, M. T. Koh, N. M. Vogt, P. R. Rapp, M. Gallagher, Hilar Interneuron Vulnerability Distinguishes Aged Rats With Memory Impairment. **3523**, 3508–3523 (2013).
89. K. D. Buzsáki, D. A. Harris, J. Henze, H. Csicsvari, G. Hirase, Measurements Simultaneous Intracellular and Extracellular Accuracy of Tetrode Spike Separation as Determined by Downloaded from. *J Neurophysiol Journal of Neurophysiology at Universitatsspital on December* **84**, 401–414 (2000).

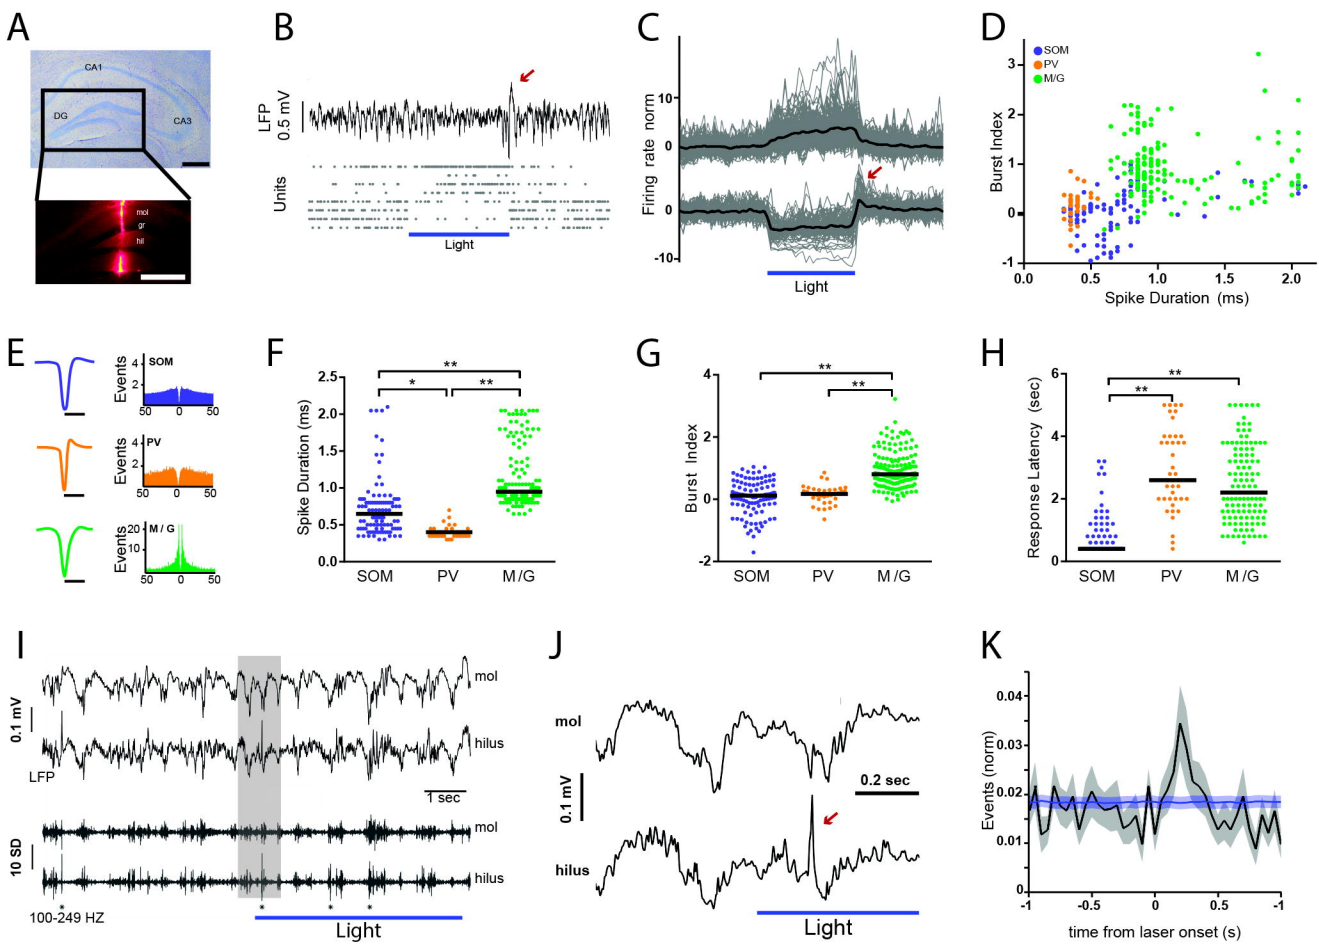

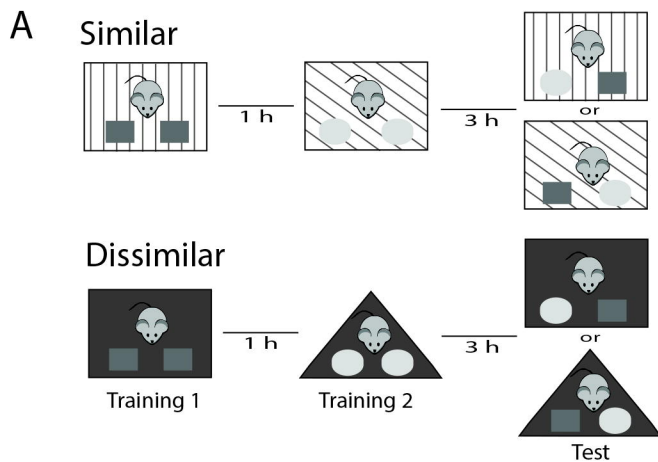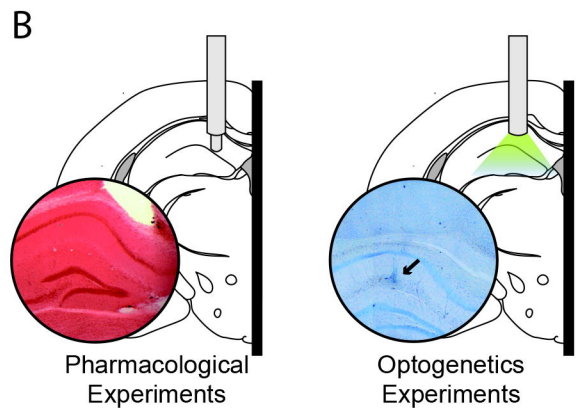

**Similar**

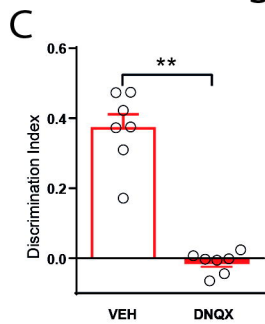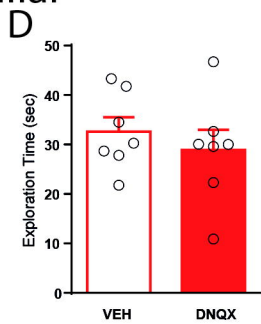

**Dissimilar**

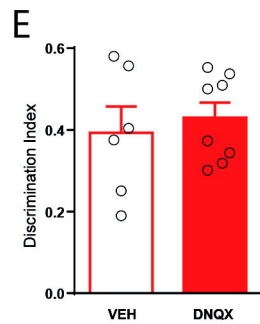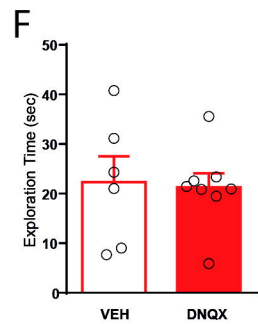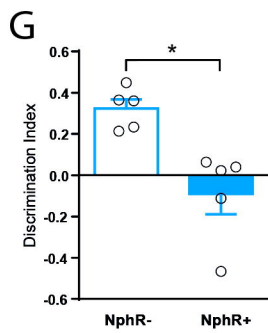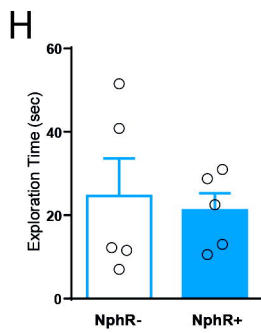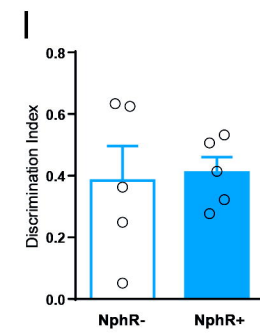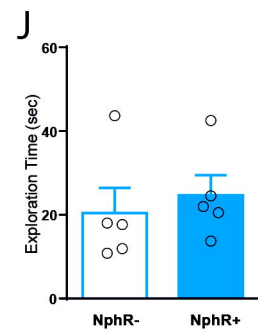

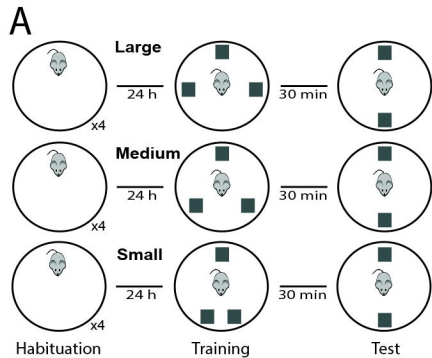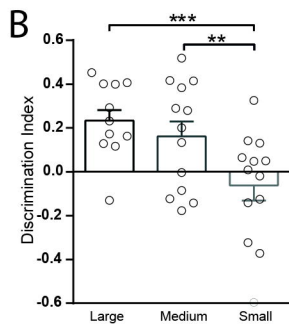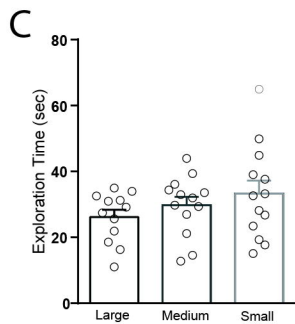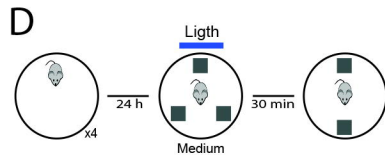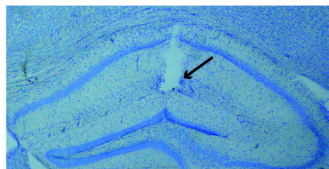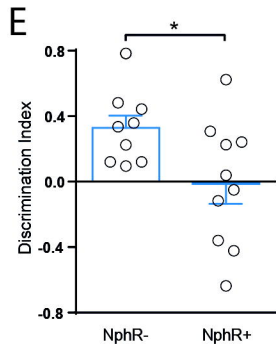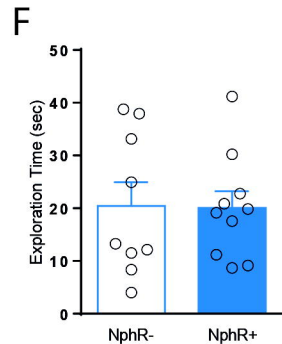

Source: https://www.biorxiv.org/content/10.1101/830182v1.full.pdf
